## CORRESPONDENCE

Anesthesiology  
81:1081, 1994  
© 1994 American Society of Anesthesiologists, Inc.  
J. B. Lippincott Company, Philadelphia

### Cervical Spine Stabilization

*To the Editor:*—We read with interest the article by Hastings and Wood<sup>1</sup> concerning head extension and laryngoscopic view during cervical spine in-line stabilization maneuvers. They state that an assistant may apply axial traction to the head of a patient with known or suspected cervical spine injury to stabilize the head and neck during laryngoscopy. However, in a study of cadavers with unstable cervical spines, axial traction on the cervical spine has been shown to cause significant subluxation as well as distraction and, therefore, cannot be recommended.<sup>2</sup> The degree of movement depends on the direction of the traction and the integrity of the surrounding tissues.

Clearly, further studies are required regarding the airway management of patients with known or suspected cervical spine injury, including effects on neurologic outcome.

**Noor M. Gajraj, M.B., B.S., F.R.C.A.**  
Senior Registrar  
Department of Anaesthesia  
Derbyshire Royal Infirmary  
Derby DE1 2QY  
United Kingdom

**John H. Pennant, M.B., B.S., F.R.C.A.**  
Assistant Professor  
Department of Anesthesiology  
University of Texas Southwestern Medical School  
5323 Harry Hines Boulevard  
Dallas, Texas 75235-9068

#### References

1. Hastings RH, Wood PR: Head extension and laryngeal view during laryngoscopy with cervical spine maneuvers. *ANESTHESIOLOGY* 80: 825–831, 1994
2. Bivins HG, Ford S, Bezmalinovic Z, Price HM, Williams JL: The effect of axial traction during orotracheal intubation of the trauma victim with an unstable cervical spine. *Ann Emerg Med* 17:25–29, 1988

(Accepted for publication June 26, 1994.)

Anesthesiology  
81:1081–1082, 1994  
© 1994 American Society of Anesthesiologists, Inc.  
J. B. Lippincott Company, Philadelphia

*In Reply:*—Thank you for the opportunity to respond to Gajraj and Pennant's letter. Although axial traction has been recommended in the past,<sup>\*</sup> the possibility that such a maneuver might distract the spinal cord in patients with unstable cervical spines is concerning and is probably the reason that some authorities now recommend that the assistant applying stabilization "attempt to balance the forces exerted by the intubator" rather than apply active axial traction.<sup>1</sup> We do not use axial traction in our clinical practice.<sup>2,3</sup> We did not discuss spinal cord distraction in our paper because the risk is currently only theoretical. Cord distraction has been demonstrated in the cadaver study mentioned by Gajraj and Pennant,<sup>4</sup> and sudden worsening of neurologic deficits has been reported when traction is applied for spine stabilization<sup>5</sup> or to expose C7 on radiographs,<sup>6</sup> but axial traction has never been reported to have an adverse effect on outcome in the setting of direct laryngoscopy. Our study focused on the effects of stabilization maneuvers on the amount of head extension

necessary to perform direct laryngoscopy. The results suggested that head extension was likely to be minimized when downward immobilization was used in preference to axial traction.

**Randolph H. Hastings, M.D., Ph.D.**  
Assistant Professor of Anesthesiology

**Paul R. Wood, M.D., B.Ch., F.R.C.A.**  
Department of Anesthesiology  
VA Medical Center (125)  
3350 La Jolla Village Drive  
San Diego, California 92161

#### References

1. Suderman VS, Crosby ET, Lui A: Elective oral tracheal intubation in cervical spine injured adults. *Can J Anaesth* 38:785–789, 1991
2. Hastings RH, Marks JD: Airway management for trauma patients with potential cervical spine injuries. *Anesth Analg* 73:471–482, 1991

\* Bagetz MS, Katz JA: Airway management of the trauma patient. *Semin Anesth* 4:114–123, 1985.
